# Supplementary material for: Health complaints before and at one and five years after removal of dental amalgam restorations – data from a prospective cohort study in Norway
Source: PubMed Central journal article supplement (PMC11302653; doi:10.2340/aos.v83.40260), 2024-05-03
Supplement: AOS-83-40260-s1.pdf [file AOS-83-40260-s1.pdf]

## Supplemental online material

Supplementary material has been published as submitted. It has not been copyedited or typeset by Acta Odontologica Scandinavica.

**Supplemental Table S1.** Items included in the Munich Amalgam Scale. Baseline mean, mean change score (Q1-Q2), standardized response mean (SRM) and 95% confidence interval are given for the Amalgam cohort. P-values for test of mean change=0 are given.

| Item                       | Baseline mean | Mean change <sup>a</sup> | p-value <sup>b</sup> | SRM <sup>c</sup> | 95%CI |       |
|----------------------------|---------------|--------------------------|----------------------|------------------|-------|-------|
|                            |               |                          |                      |                  | Upper | Lower |
| Bleeding of the gums       | 0.78          | 0.13                     | 0.255                | 0.21             | -0.15 | 0.55  |
| Fatigue                    | 1.72          | 0.28                     | 0.059                | 0.35             | -0.01 | 0.70  |
| Trembling                  | 0.50          | 0.16                     | 0.096                | 0.30             | -0.05 | 0.66  |
| Sleeplessness              | 1.25          | 0.22                     | 0.198                | 0.23             | -0.12 | 0.58  |
| Getting tired fast         | 1.88          | 0.13                     | 0.423                | 0.14             | -0.21 | 0.49  |
| Eye infection              | 0.25          | 0.03                     | 0.786                | 0.05             | -0.30 | 0.40  |
| Susceptible to infection   | 0.66          | 0.16                     | 0.407                | 0.15             | -0.20 | 0.50  |
| Loss of appetite           | 0.47          | 0.19                     | 0.083                | 0.32             | -0.04 | 0.67  |
| Dyspnea                    | 0.41          | 0.03                     | 0.712                | 0.07             | -0.28 | 0.41  |
| Grinding one's teeth       | 0.59          | 0.13                     | 0.255                | 0.21             | -0.15 | 0.55  |
| Loosening of teeth         | 0.09          | 0.06                     | 0.423                | 0.14             | -0.21 | 0.49  |
| Muscle weakness legs       | 1.00          | 0.22                     | 0.129                | 0.28             | -0.08 | 0.63  |
| Reaction slowed down       | 0.47          | -0.03                    | 0.786                | -0.05            | -0.40 | 0.30  |
| Lack of concentration      | 1.50          | 0.34                     | 0.039                | 0.38             | 0.02  | 0.74  |
| Memory disorders           | 1.22          | 0.06                     | 0.645                | 0.08             | -0.27 | 0.43  |
| Intense nervousness        | 0.56          | 0.22                     | 0.070                | 0.33             | -0.03 | 0.69  |
| Sadness                    | 0.72          | 0.09                     | 0.414                | 0.15             | -0.20 | 0.49  |
| Depressed mood             | 0.75          | 0.19                     | 0.110                | 0.29             | -0.07 | 0.64  |
| Irritability               | 1.09          | 0.22                     | 0.006                | 0.52             | 0.15  | 0.89  |
| Worries - restlessness     | 1.06          | 0.47                     | 0.005                | 0.53             | 0.16  | 0.90  |
| Headache                   | 1.06          | 0.00                     | 1.000                | 0.00             | -0.35 | 0.35  |
| Burning sensations tongue  | 0.56          | 0.28                     | 0.048                | 0.36             | 0.00  | 0.72  |
| Dry mouth                  | 0.91          | 0.16                     | 0.344                | 0.17             | -0.18 | 0.52  |
| Metallic taste             | 0.91          | 0.88                     | <0.001               | 0.93             | 0.51  | 1.34  |
| Dizziness                  | 0.97          | 0.19                     | 0.083                | 0.32             | -0.04 | 0.67  |
| Visual disorders           | 0.81          | 0.13                     | 0.211                | 0.23             | -0.13 | 0.58  |
| Hearing disorders          | 0.72          | 0.06                     | 0.423                | 0.14             | -0.21 | 0.49  |
| Cough attacks              | 0.41          | 0.00                     | 1.000                | 0.00             | -0.35 | 0.35  |
| Arrythmia                  | 0.75          | 0.28                     | 0.027                | 0.41             | 0.05  | 0.77  |
| Diarrhea                   | 0.75          | 0.28                     | 0.027                | 0.41             | 0.05  | 0.77  |
| Vomiting                   | 0.13          | -0.03                    | 0.662                | -0.08            | -0.42 | 0.27  |
| Increased urge to toilet   | 1.09          | 0.28                     | 0.027                | 0.41             | 0.05  | 0.77  |
| Hair loss                  | 0.41          | 0.13                     | 0.458                | 0.13             | -0.22 | 0.48  |
| Skin rash                  | 0.97          | 0.34                     | 0.003                | 0.57             | 0.19  | 0.94  |
| Skin itching               | 1.16          | 0.28                     | 0.059                | 0.35             | -0.01 | 0.70  |
| Joint complaints           | 1.75          | 0.22                     | 0.129                | 0.28             | -0.08 | 0.63  |
| Increased sweating         | 1.03          | 0.25                     | 0.088                | 0.31             | -0.05 | 0.66  |
| Allergic reactions         | 1.06          | 0.28                     | 0.071                | 0.33             | -0.03 | 0.68  |
| Sensitivity to cold, wind  | 1.25          | 0.41                     | 0.005                | 0.54             | 0.16  | 0.91  |
| Fluctuating mood           | 1.06          | 0.25                     | 0.044                | 0.37             | 0.01  | 0.73  |
| Indecision                 | 0.97          | 0.28                     | 0.027                | 0.41             | 0.05  | 0.77  |
| Anxiety                    | 0.78          | 0.25                     | 0.044                | 0.37             | 0.01  | 0.73  |
| Stress at the job          | 1.63          | 0.66                     | <0.001               | 0.83             | 0.43  | 1.23  |
| Weight loss                | 0.44          | 0.19                     | 0.136                | 0.27             | -0.08 | 0.62  |
| Overweight                 | 0.50          | 0.09                     | 0.263                | 0.20             | -0.15 | 0.55  |
| Constipation               | 0.59          | 0.06                     | 0.601                | 0.09             | -0.26 | 0.44  |
| Abdominal pain             | 0.94          | 0.28                     | 0.027                | 0.41             | 0.05  | 0.77  |
| Tinnitus                   | 1.19          | 0.19                     | 0.110                | 0.29             | -0.07 | 0.64  |
| Menstrual disorders (n=19) | 0.37          | 0.11                     | 0.682                | 0.10             | -0.43 | 0.64  |

## Supplemental online material

|                                    |      |      |       |      |      |      |
|------------------------------------|------|------|-------|------|------|------|
| Feeling of walking next to oneself | 0.63 | 0.28 | 0.018 | 0.44 | 0.08 | 0.80 |
|------------------------------------|------|------|-------|------|------|------|

a) Baseline minus follow up value; A positive value indicates reduction of symptoms

b) 2-tailed significance from paired sample t-test

c) Standardized response mean (mean difference divided with the standard deviation of mean difference).

**Supplemental online material**

**Supplemental Table S2.** Mean intensity scores and standard errors (SE) for general health complaints at baseline and the follow-ups (Q2 and Q3) for the MUPS cohort (n=28). P-values calculated by linear mixed models for test of change from Q1 ( $H_0$ : Change score = 0).

|                               | Q1   |     | Q2   |     |       | Q3   |     |       |
|-------------------------------|------|-----|------|-----|-------|------|-----|-------|
|                               | Mean | SE* | Mean | SE* | p     | Mean | SE* | p     |
| General symptoms              |      |     |      |     |       |      |     |       |
| Pain from muscles and joints  | 6.1  | 0.5 | 6.1  | 0.5 | 0.942 | 6.2  | 0.5 | 0.666 |
| Gastrointestinal symptoms     | 3.2  | 0.5 | 2.9  | 0.5 | 0.551 | 2.7  | 0.5 | 0.360 |
| Cardiovascular symptoms       | 1.4  | 0.3 | 1.2  | 0.3 | 0.414 | 1.3  | 0.3 | 0.658 |
| General skin problems         | 1.7  | 0.4 | 1.4  | 0.4 | 0.514 | 1.7  | 0.4 | 0.896 |
| Visual disturbances           | 2.2  | 0.4 | 2.7  | 0.4 | 0.311 | 2.6  | 0.4 | 0.507 |
| Symptoms from ear/nose/throat | 1.9  | 0.4 | 1.5  | 0.4 | 0.415 | 2.1  | 0.4 | 0.614 |
| Fatigue                       | 5.4  | 0.5 | 4.9  | 0.5 | 0.313 | 5.3  | 0.5 | 0.742 |
| Dizziness                     | 2.6  | 0.4 | 2.5  | 0.4 | 0.763 | 2.6  | 0.5 | 0.997 |
| Headache                      | 3.5  | 0.5 | 3.8  | 0.5 | 0.479 | 4.2  | 0.5 | 0.117 |
| Memory problems               | 2.8  | 0.5 | 3.1  | 0.5 | 0.556 | 3.3  | 0.5 | 0.346 |
| Difficult to concentrate      | 3.6  | 0.5 | 3.2  | 0.5 | 0.295 | 4.0  | 0.5 | 0.353 |
| Anxiety/depression            | 2.1  | 0.4 | 2.0  | 0.4 | 0.828 | 2.4  | 0.4 | 0.611 |

\* Delta method

**Supplemental online material**

**Supplemental Table S3.** Mean intensity scores and standard deviation (SD) for local and general health complaints at baseline (Q1) and the follow-ups (Q2 and Q3) for the Healthy cohort (n=12). Friedman's test was used for calculation of p-values to test if medians are equal ( $H_0: Q1=Q2=Q3$ ).

|                                    | Q1   |     | Q2   |     | Q3   |     | p-value* |
|------------------------------------|------|-----|------|-----|------|-----|----------|
|                                    | Mean | SD  | Mean | SD  | Mean | SD  |          |
| <b>Local symptoms</b>              |      |     |      |     |      |     |          |
| Intraoral burning sensation        | 0.0  | 0.0 | 0.2  | 0.6 | 0.4  | 1.4 | 0.778    |
| Intraoral pain/tenderness          | 0.0  | 0.0 | 0.1  | 0.2 | 0.0  | 0.0 | 1.000    |
| Taste disturbances                 | 0.0  | 0.0 | 0.1  | 0.3 | 0.0  | 0.0 | 0.333    |
| Intraoral stiffness/paresthesia    | 0.0  | 0.1 | 0.2  | 0.6 | 0.0  | 0.1 | 0.667    |
| Dry mouth                          | 0.3  | 0.6 | 0.1  | 0.2 | 0.5  | 0.9 | 0.099    |
| Increased salivation/mucus         | 0.1  | 0.3 | 0.1  | 0.3 | 0.2  | 0.6 | 0.889    |
| Orofacial burning sensation        | 0.1  | 0.3 | 0.1  | 0.2 | 0.0  | 0.0 | 0.667    |
| Orofacial pain/tenderness          | 0.0  | 0.0 | 0.2  | 0.6 | 0.1  | 0.3 | 0.333    |
| Orofacial stiffness/paresthesia    | 0.0  | 0.0 | 0.2  | 0.3 | 0.0  | 0.0 | 0.111    |
| Orofacial skin problems            | 1.0  | 1.4 | 1.2  | 2.1 | 0.3  | 0.9 | 0.057    |
| Pain from temporomandibular joints | 0.3  | 0.9 | 0.4  | 0.7 | 0.3  | 0.8 | 0.898    |
| <b>General symptoms</b>            |      |     |      |     |      |     |          |
| Pain from muscles and joints       | 1.6  | 2.0 | 1.8  | 1.8 | 2.6  | 2.1 | 0.292    |
| Gastrointestinal symptoms          | 0.6  | 0.9 | 0.7  | 1.3 | 0.6  | 1.1 | 0.842    |
| Cardiovascular symptoms            | 0.0  | 0.0 | 0.1  | 0.3 | 0.2  | 0.6 | 0.778    |
| General skin problems              | 0.9  | 1.4 | 0.5  | 1.1 | 0.5  | 0.8 | 0.769    |
| Visual disturbances                | 0.3  | 0.4 | 0.7  | 1.3 | 0.6  | 0.9 | 0.707    |
| Symptoms from ear/nose/throat      | 0.0  | 0.0 | 0.0  | 0.1 | 0.1  | 0.3 | 0.111    |
| Fatigue                            | 0.7  | 1.0 | 0.4  | 0.7 | 0.3  | 0.6 | 0.879    |
| Dizziness                          | 0.0  | 0.0 | 0.1  | 0.2 | 0.2  | 0.4 | 0.444    |
| Headache                           | 0.2  | 0.4 | 0.4  | 0.5 | 0.2  | 0.6 | 0.194    |
| Memory problems                    | 0.0  | 0.0 | 0.3  | 0.7 | 0.1  | 0.3 | 0.333    |
| Difficult to concentrate           | 0.1  | 0.3 | 0.3  | 0.5 | 0.3  | 0.4 | 0.457    |
| Anxiety/depression                 | 0.2  | 0.4 | 0.3  | 0.6 | 0.4  | 0.7 | 0.670    |

\* Exact p-values
